# Supplementary material
Source: publisher figshare collection journal article supplement (https://sage.figshare.com/ndownloader/files/22849571)

## Supplemental Materials

Additional HLM analyses with PPP and GCI in two separate models

**Table A1**

*Hierarchical Linear Modelling with PPP and GCI in separate models*

|                                    | Model with PPP          |                 | Model with GCI          |                 |
|------------------------------------|-------------------------|-----------------|-------------------------|-----------------|
|                                    | Estimates ( <i>SE</i> ) | <i>t</i> -value | Estimates ( <i>SE</i> ) | <i>t</i> -value |
| Intercept                          | 6.92 (0.19)             | 36.27**         | 6.92 (0.19)             | 36.55**         |
| Age                                | -0.01 (0.02)            | -0.39           | -0.01 (0.02)            | -0.38           |
| Gender                             | 0.06 (0.02)             | 3.65**          | 0.06 (0.02)             | 3.41**          |
| Education                          | 0.09 (0.02)             | 4.75**          | 0.09 (0.02)             | 4.80**          |
| Employment Type (Full-time)        | 0.01 (0.03)             | 0.50            | 0.02 (0.03)             | 0.60            |
| Employment Type (Part-time)        | -0.03 (0.02)            | -1.12           | -0.02 (0.02)            | -0.95           |
| Conscientiousness                  | 0.16 (0.02)             | 8.14**          | 0.16 (0.02)             | 7.96**          |
| Emotional Stability                | 0.26 (0.02)             | 14.87**         | 0.25 (0.02)             | 14.35**         |
| Agreeableness                      | 0.05 (0.02)             | 2.89**          | 0.05 (0.02)             | 2.82**          |
| Extraversion                       | 0.02 (0.02)             | 1.15            | 0.00 (0.02)             | 0.25            |
| Openness to Experience             | 0.02 (0.02)             | 1.05            | 0.02 (0.02)             | 0.91            |
| Purchasing Power Parity (PPP)      | -0.16 (0.27)            | -0.59           | -0.16 (0.27)            | -0.59           |
| Global Competitiveness Index (GCI) | 0.53 (0.27)             | 1.93            | 0.51 (0.27)             | 1.90            |
| <i>Interactions:</i>               |                         |                 |                         |                 |
| Conscientiousness x PPP            | <b>0.05 (0.02)</b>      | <b>2.82**</b>   |                         |                 |
| Emotional Stability x PPP          | <b>0.04 (0.02)</b>      | <b>2.47*</b>    |                         |                 |
| Agreeableness x PPP                | <b>0.08 (0.02)</b>      | <b>4.16**</b>   |                         |                 |
| Extraversion x PPP                 | 0.02 (0.02)             | 1.13            |                         |                 |
| Openness to Experience x PPP       | 0.02 (0.02)             | 1.36            |                         |                 |
| Conscientiousness x GCI            |                         |                 | <b>.04 (0.02)</b>       | <b>1.99*</b>    |
| Emotional Stability x GCI          |                         |                 | .03 (0.02)              | 1.50            |
| Agreeableness x GCI                |                         |                 | <b>.07 (0.02)</b>       | <b>3.56**</b>   |
| Extraversion x GCI                 |                         |                 | <b>.07 (0.02)</b>       | <b>3.57**</b>   |
| Openness to Experience x GCI       |                         |                 | .02 (0.02)              | 1.06            |

Note. Sample size = 13,265 from 18 nations. \* $p < .05$ . \*\* $p < .01$ .

**Figure A1**

*The interaction between conscientiousness and PPP in predicting individuals' life satisfaction*

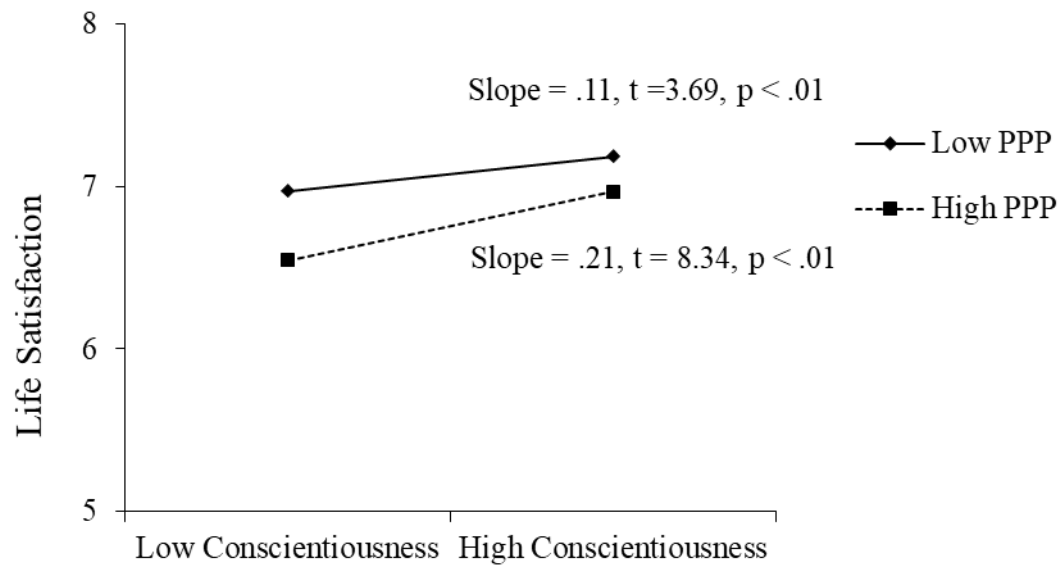

**Figure A2**

*The interaction between emotional stability and PPP in predicting individuals' life satisfaction*

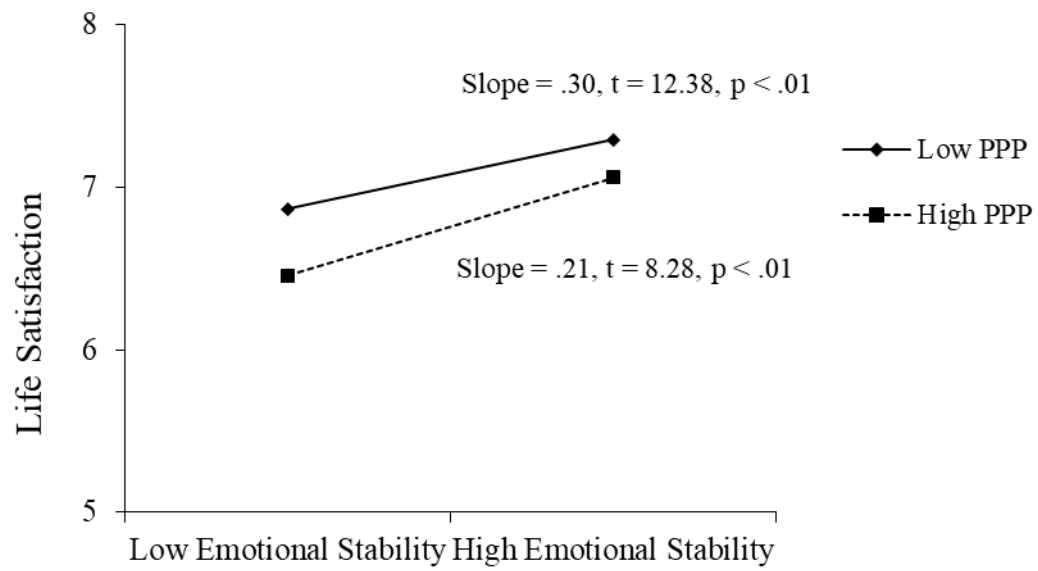

**Figure A3**

*The interaction between agreeableness and PPP in predicting individuals' life satisfaction*

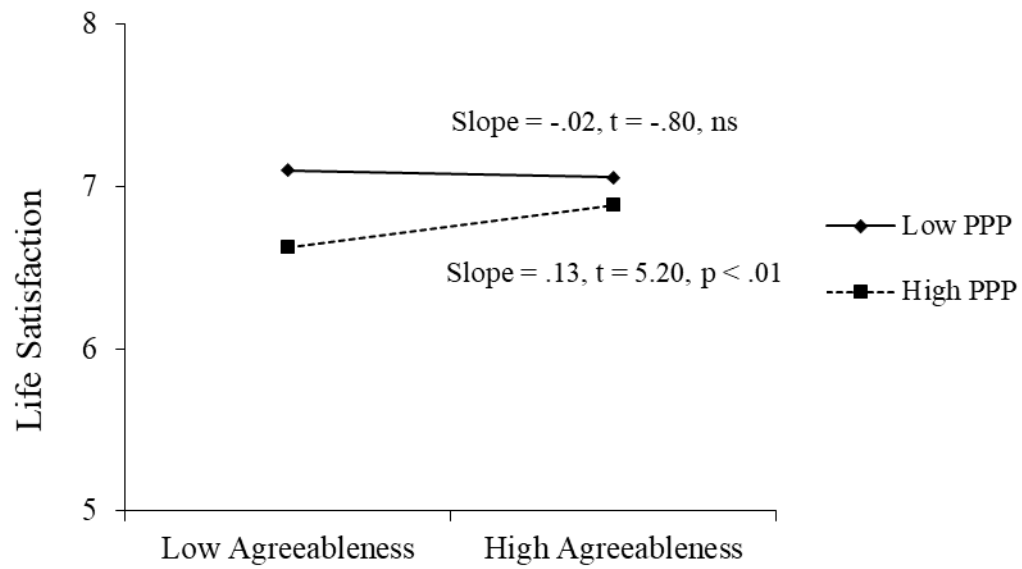

**Figure A4**

*The interaction between conscientiousness and GCI in predicting individuals' life satisfaction*

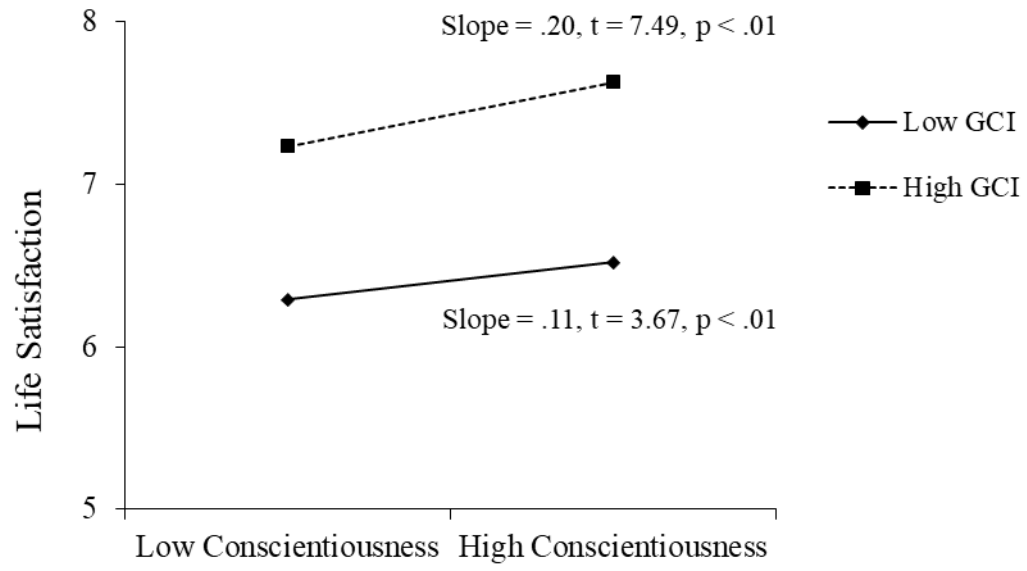

**Figure A5**

*The interaction between agreeableness and GCI in predicting individuals' life satisfaction*

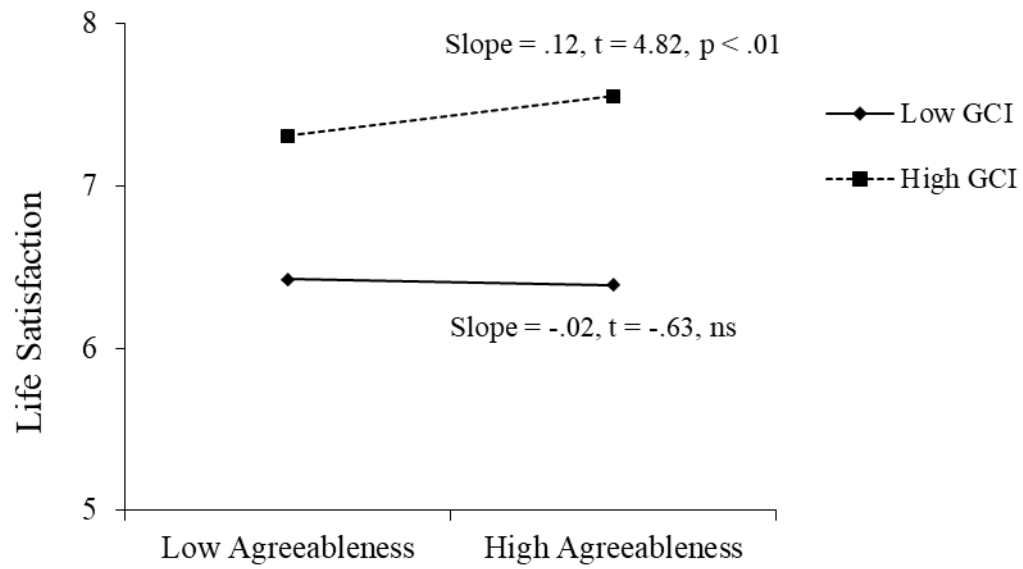

**Figure A6**

*The interaction between extroversion and GCI in predicting individuals' life satisfaction*

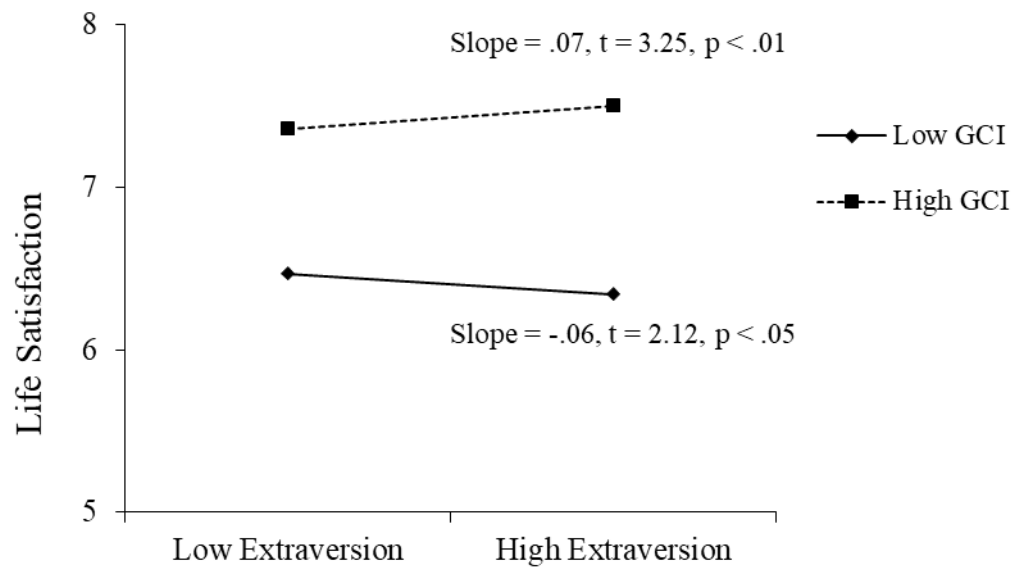

Supplement: Supplementary file 1 [file 22849571]
